# Supplementary material
Source: PubMed Central journal article supplement (PMC2481347)
Supplement: 0803565105_0803565105SI.pdf [file 0803565105_0803565105SI.pdf]

# Supporting Information

Budzik et al. 10.1073/pnas.0803565105

## SI Text

**Plasmids and Strains.** PCR with primer pairs P2 (encompassing an XbaI site) and P114 (NheI) amplified *bcpA* between residues 26 and 149. Primers P113 (NheI) and P103 (KpnI) amplified a fragment of *bcpA* beginning at residue 150 with the MH<sub>6</sub> tag and sortase D. Primer pairs P2/P114 and P113/103 generated PCR products that were digested with XbaI/NheI and NheI/KpnI and ligated into pLM5 digested with XbaI/KpnI to create pJB44. The following primers were used to create single amino acid substitutions in BcpA by site-directed mutagenesis as previously reported (1). Primers 73/74 created the K162A substitution in pJB44 thereby generating pJB57. Four substitutions were constructed in pJB44 to generate pJB103: primers 122/123 were used for the M159L substitution, 149/150 for the K151A substitution, 191/192 for the K166M substitution, and 181/182 for the I518M substitution. Primers 201/202 created the N163A substitution in pJB103, resulting in pJB112.

pJB7 encodes for BcpA-His<sub>6</sub> without the amino-terminal signal peptide or the carboxy-terminal sorting signal in the pET24-b expression vector (Novagen) (2). pJB7 was used as template to generate substitution mutations in *bcpA* via Quick-Change mutagenesis. Primers 183/184 introduced the E472A substitution of *bcpA*, thereby generating pJB97. Primers 185/186 introduced the E223A substitution of *bcpA* and generated pJB98. For pJB105, a plasmid harboring E223A and E472A substitutions, Quick-Change was performed with pJB97 template and primers 185/186.

pJB12 (1) encodes *bcpA-srtD-bcpB* under control of the IPTG-inducible P<sub>spac</sub> promoter. Primers 183/184 introduced the E472A substitution in *bcpA* to generate pJB107. Primers 185/186 introduced the E223A substitution in BcpA, resulting in pJB108. To introduce both the E223A and E472A substitutions in *bcpA*, pJB107 was used as a template for mutagenesis with P185/186, thereby generating pJB123. Primers 197/198 introduced the N163A substitution in *bcpA* to produce pJB109.

pJB69 encodes for the translational fusion *bcpA-gst-srtD* under control of the IPTG-inducible P<sub>spac</sub> promoter. Templates for amplification of *bcpA-srtD* and *gst* were *B. cereus* chromosomal DNA and pGEX2TK (Amersham Biosciences), respectively. Insertion of P2/P151 (*bcpA*), P152/P153 (*gst*), P154/P103 PCR products into pLM5, using XbaI, NheI, NcoI, and KpnI sites, resulted in pJB69. To generate pJB86, an isogenic plasmid lacking *srtD*, pJB69 was amplified with *Pfu* DNA polymerase and P88/P89. Amplified plasmids were first incubated for 3 h with DpnI to digest methylated parental plasmid DNA and were then digested with KpnI for 2 h. Digested plasmid DNA was ligated and transformed into *E. coli* DH5 $\alpha$ .

pJB1 (3) was used for expression of an untagged version of PlyL amidase (4).

**Pilus Assembly.** *B. anthracis* strain Sterne F32 or its isogenic variant AHG263 (*srtA::ermC*) (5) harboring pLM5 or plasmids encoding for *B. cereus* pilus genes were grown overnight at 30°C on LB agar plates containing kanamycin and IPTG. Cells were suspended in 100 mM NaCl, vortexed briefly, and centrifuged for 2 min at 6,000  $\times$  g. The supernatant and sediment were separated and analyzed directly by immunoelectron microscopy with  $\alpha$ -BcpA antisera and 10 nm gold anti-rabbit IgG conjugate as reported (1). For immunoblotting experiments, supernatant aliquots were precipitated with 7% TCA, incubated on ice for 30 min, and centrifuged at 16,000  $\times$  g for 10 min. The sediment was washed with 500  $\mu$ l of acetone, air-dried, and suspended in 500

$\mu$ l of 4% SDS, 50 mM Tris-HCl, pH 8.0. For immunoblotting experiments, cells were extracted for 10 min by boiling with 500  $\mu$ l of 6 M urea, 1% SDS, 50 mM Tris-HCl, pH 9.5. Bacterial samples were washed in water, TCA extracted, and peptidoglycan was digested with mutanolysin (1).

## Cyanogen Bromide Cleavage of Pili and Purification of Assembled Pilin Subunits.

*B. anthracis* AHG263 (*srtA::ermC*) (5) harboring pJB103 or pJB112 was grown for 22 h at 30°C on 80 LB agar plates containing kanamycin and IPTG. Cells were suspended in 16 ml of water, vortexed briefly, and centrifuged for 10 min at 6,000  $\times$  g. Supernatant was retrieved and centrifuged again for 10 min at 6,000  $\times$  g to sediment remaining cells. Pili in the supernatant were digested with cyanogen bromide in 70% formic acid for 16 h at room temperature in the dark (6). The reaction mixture was dried under vacuum, washed twice with water, and dissolved in 30 ml of buffer A (6 M guanidine hydrochloride, 0.1 M NaH<sub>2</sub>PO<sub>4</sub>, 0.01 M Tris-HCl, pH 8.0). The sample was loaded on 2 ml of Ni-NTA Sepharose column preequilibrated with buffer A, washed with 15 ml of buffer A, and 15 ml of buffer B (8 M urea, 0.1 M NaH<sub>2</sub>PO<sub>4</sub>, 0.01 M Tris-HCl, pH 8.0). Cleavage products were eluted with 2 ml of buffer C (same as buffer B but pH 2.0). Proteins were subjected to RP-HPLC over C8 column with a linear gradient from 1% to 90% acetonitrile (CH<sub>3</sub>CN) in 0.1% TFA in 90 min. Fractions (1 min) were concentrated ten-fold under vacuum to remove acetonitrile, and aliquots were subjected to SDS/PAGE, mass spectrometry, Edman degradation, and enzymatic cleavage with trypsin.

**MALDI-MS.** HPLC fractions were mixed in a 1:1 ratio with CH<sub>3</sub>CN-water-trifluoroacetic acid (TFA; 60:40:0.1). Samples (0.4  $\mu$ l) were cospotted with matrix (0.4  $\mu$ l;  $\alpha$ -cyano-4-hydroxycinnamic acid; Sigma) at 10 mg/ml in CH<sub>3</sub>CN-water-trifluoroacetic acid (TFA; 30:40:0.1), 4 mM (NH<sub>4</sub>)<sub>2</sub>HPO<sub>4</sub>. Matrix-assisted laser desorption ionization-mass spectrometry (MALDI-MS) spectra were obtained in a reflectron time-of-flight (TOF) instrument (ABI Biosystems) in linear and reflectron modes. Spectra were acquired using external calibration with bovine insulin.

**ESI-FTMS.** For direct infusion, sequential HPLC fractions were individually loaded into 2  $\mu$ m i.d. externally coated nanospray emitters (New Objective Inc.) and desorbed using a spray voltage of between 1.2 and 1.4 kV (vs. the inlet of the mass spectrometer) (7). These conditions produced a flow rate of 20–50 nl/min. Protein and peptide samples were analyzed using a hybrid linear ion-trap/FTICR mass spectrometer (LTQ FT Ultra, Thermo Electron) at the University of California, Los Angeles (UCLA), as described (7). Fragmentation experiments included collision activated dissociation (CAD), electron capture dissociation (ECD), activated ion electron capture dissociation (aiECD), and infrared multiphoton dissociation (IRMPD). All FTICR fragmentation spectra were analyzed using the Manual Extract software program (Thermo Electron), which generated a list of monoisotopic mass values from the multiply-charged ion datas. Theoretical fragmentation spectra were produced with Protein-Prospector v4.27.2 MS-Product web-based program (University of California, San Francisco; <http://prospector.ucsf.edu>). Observed average molecular weight calculations were performed with the XTRACTAll for Qual Browser program (Thermo Electron).

### Trypsin Digestion and Purification of Branched Tryptic Peptides.

Protein concentration in HPLC fractions was determined by bicinchoninic assay (Pierce), and residual TFA was neutralized by concentrated sodium hydroxide and 66 mM ammonium bicarbonate, pH 8.0. Sequencing grade modified trypsin (Promega) was prepared according to the manufacturer's instructions and added at an enzyme:substrate weight ratio of 1:20. The reaction was allowed to proceed for 16 h at 37°C. Tryptic peptides were combined with 12 ml of denaturing buffer A and purified by Ni-NTA affinity chromatography as described above. Purified peptides were subjected to RP-HPLC over a C18 column with a linear gradient from 1% to 90% acetonitrile (CH<sub>3</sub>CN) in 0.1% formic acid in 90 min. Samples were concentrated under vacuum, and aliquots subjected to mass spectrometry and Edman degradation. MALDI-MS was performed as previously described except that the samples and matrix were diluted in CH<sub>3</sub>CN-water-formic acid.

**Edman Degradation.** Samples were subjected to SDS/PAGE, transferred to PVDF membranes, stained with amido black, and submitted for Edman sequencing at the University of Illinois at Urbana-Champaign (UIUC) Biotechnology Center Protein Sciences Facility. Peptide RP-HPLC samples were dried under vacuum and submitted for Edman sequencing.

**Purification of BcpA-GST Cleavage Products.** *B. anthracis* strains Sterne and AHG263 (*srtA::ermC*) harboring pJB69 (*bcpA-gst-srtD*) or pJB86 (*bcpA-gst*) were grown in 6 liters of media containing IPTG and kanamycin at 30°C. Sedimented cells were suspended in 50 ml of PlyL buffer (0.5 M sucrose, 1 mM DTT, 1 mM PMSF, 1 mM EDTA, 5 mM sodium phosphate, pH 6.0) and subjected to 10 1-min pulses with a bead beater. The cells

were combined with 15 ml of an *E. coli* BL21(DE3)(pJB1) lysate (3). PlyL digestion of the cell wall was allowed to occur for 16 h at 22°C. Protoplasts were sedimented by centrifugation at 9,200 × *g* and resuspended in TSE-triton [20 mM Tris, 200 mM NaCl, 10 mM EDTA, 10 mM β-mercaptoethanol, 1% Triton X-100, pH 7.5, with 1 mg DNase I, 150 μg RNase A, and 1 mM phenylmethanesulphonyl fluoride (PMSF)] (8). The protoplasts were disrupted by sonication 10 times with 10-sec pulses. Protoplasts were incubated for 4 hours at 4°C with stirring, and insoluble material was removed by centrifugation. After adjusting the pH of the supernatant to 8.0 with 2 M sodium phosphate, BcpA-GST cleavage products were subjected to 1.5 ml of glutathione-Sepharose column preequilibrated with TSE-triton, washed with TSE-triton, and eluted with 20 mM glutathione (pH 8.0). Aliquots were subjected to SDS/PAGE and stained with Coomassie R-250. Protein species were excised and submitted for trypsin digestion and LC-ESI-MS/MS at the Taplin Mass Spectrometry facility, Harvard Medical School. The purified cleavage products were concentrated 5-fold under vacuum and prepared for Edman degradation.

**Trypsin Digestion and Mass Spectrometry of Recombinant BcpA-His<sub>6</sub> Proteins.** Recombinant BcpA<sub>His-6</sub> (1) and its variants were digested with sequencing grade modified trypsin (Promega) at 37°C with enzyme:substrate ratio of 1:50 for 24 h. Aliquots were subjected to SDS/PAGE and stained with Coomassie R-250.

Recombinant proteins were subjected to RP-HPLC with a PLRP-S polymeric reverse phase column (Polymer Labs; dimensions 150 × 2.1 mm, 300 Å and 5 μm particle size) and a linear gradient from 5% to 60% acetonitrile (CH<sub>3</sub>CN) in 0.1% formic acid in 45 min. Mass measurements of RP-HPLC fraction 38 were performed by direct infusion of sample loaded into nanospray emitters in the LTQ FT Ultra mass spectrometer.

1. Budzik JM, Marraffini LA, Schneewind O (2007) Assembly of pili on the surface of *Bacillus cereus* vegetative cells. *Mol Microbiol* 66:495–510.
2. Studier FW, Rosenberg AH, Dunn JJ, Dubendorff JW (1990) Use of T7 polymerase to direct expression of cloned genes. *Methods Enzymol* 185:60–89.
3. Marraffini LA, Schneewind O (2007) Sortase C-mediated anchoring of Bsl to the cell wall envelope of *Bacillus anthracis*. *J Bacteriol* 189:6425–6436.
4. Low LY, Yang C, Perego M, Osterman A, Liddington RC (2005) Structure and lytic activity of a *Bacillus anthracis* prophage endolysin. *J Biol Chem* 280:35433–35439.
5. Gaspar AH, et al. (2005) *Bacillus anthracis* sortase A (SrtA) anchors LPXTG motif-containing surface proteins to the cell wall envelope. *J Bacteriol* 187:4646–4655.
6. Ton-That H, Labischinski H, Berger-Bächi B, Schneewind O (1998) Anchor structure of staphylococcal surface proteins. III. The role of the FemA, FemB, and FemX factors in anchoring surface proteins to the bacterial cell wall. *J Biol Chem* 273:29143–29149.
7. Zabrouskov V, Whitelegge JP (2007) Increased coverage in the transmembrane domain with activated-ion electron capture dissociation for top-down Fourier-transform mass spectrometry of integral membrane proteins. *J Proteome Res* 6:2205–2210.
8. Navarre WW, Schneewind O (1994) Proteolytic cleavage and cell wall anchoring at the LPXTG motif of surface proteins in gram-positive bacteria. *Mol Microbiol* 14:115–121.



**Table S1. Edman degradation of BcpA**

| Compound A of BcpA pili |                                 |
|-------------------------|---------------------------------|
| Cycle                   | Amino acid (pM)                 |
| 1                       | H (17.05), L (35.04), D (13.47) |
| 2                       | H (13.79), P (27.85), S (6.37)  |
| 3                       | H (13.87), V (20.65), P (21.58) |
| 4                       | H (13.22), T (23.07), S (4.30)  |
| 5                       | H (12.64), K (2.04)             |
| 6                       | H (10.4), G (4.39)              |
| 7                       | G (9.37), T (8.17)              |
| 8                       | A (7.01), L (2.59)              |
| 9                       | V (6.98), T (5.32)              |
| 10                      | L (5.91), I (2.95)              |
| 11                      | N (4.40)                        |
| 12                      | Y (3.66)                        |
| 13                      | D (4.19)                        |
| 14                      | V (5.20)                        |
| 15                      | H (2.26)                        |
| 16                      | L (3.15)                        |
| 17                      | Y (2.80)                        |

| Compound A1 of BcpA pili |                                 |
|--------------------------|---------------------------------|
| Cycle                    | Amino acid (pM)                 |
| 1                        | H (44.30), L (89.11), G (57.91) |
| 2                        | H (36.51), P (46.50), T (82.49) |
| 3                        | H (41.30), V (52.06), L (56.11) |
| 4                        | H (40.76), T (127.40)           |
| 5                        | H (42.86), I (42.20)            |
| 6                        | H (68.46),<br>G (19.39)         |
| 7                        |                                 |
| 8                        | A (22.82), Y (27.37)            |
| 9                        | V (21.07), E (18.72)            |
| 10                       | L (18.81), Q (14.94)            |
| 11                       | N (16.45), E (14.80)            |
| 12                       | Y (15.81)                       |
| 13                       | D (13.69)                       |
| 14                       | V (12.47)                       |
| 15                       | H (6.16)                        |
| 16                       | L (8.45)                        |
| 17                       | Y (7.08)                        |

| Compound A* of BcpA pili |                          |
|--------------------------|--------------------------|
| Cycle                    | Amino acid (pM)          |
| 1                        | H (1320.96), L (1721.18) |
| 2                        | H (1246.33), P (975.19)  |
| 3                        | H (1243.34), V (1047.13) |
| 4                        | H (1308.06), T (1281.12) |
| 5                        | H (1268.51)              |
| 6                        | H (1090.57)              |
| 7                        | G (614.07)               |
| 8                        | A (723.29)               |
| 9                        | V (543.92)               |
| 10                       | L (497.28)               |
| 11                       | N (417.33)               |
| 12                       | Y (388.16)               |
| 13                       | D (323.97)               |
| 14                       | V (259.14)               |
| 15                       | H (147.38)               |
| 16                       | L (107.27)               |
| 17                       | Y (66.50)                |
| 18                       | P (23.87)                |
| 19                       | K (8.84)                 |
| 20                       | A (8.53)                 |

| BcpA <sub>His6</sub> |                 |
|----------------------|-----------------|
| Cycle                | Amino acid (pM) |
| 1                    | A (28.25)       |
| 2                    | S (14.82)       |
| 3                    | M (11.17)       |
| 4                    | T (28.27)       |
| 5                    | G (21.45)       |
| 6                    | G (25.48)       |
| 7                    | Q (9.44)        |

| BcpA-GST product of SrtD |                 |
|--------------------------|-----------------|
| Cycle                    | Amino acid (pM) |
| 1                        | G (2.18)        |
| 2                        | G (2.65)        |
| 3                        | I (2.03)        |
| 4                        | G (2.3)         |
| 5                        | T (1.39)        |
| 6                        | T (1.39)        |
| 7                        | L (1.55)        |
| 8                        | F (1.19)        |

| BcpA-GST product of SrtA |                 |
|--------------------------|-----------------|
| Cycle                    | Amino acid (pM) |
| 1                        | G (1.06)        |
| 2                        | G (1.22)        |
| 3                        | I (0.57)        |
| 4                        | G (1.15)        |
| 5                        | T (0.50)        |
| 6                        | T (0.45)        |
| 7                        | L (0.88)        |
| 8                        | F (0.69)        |

| BcpA-GST product of SrtAD |                 |
|---------------------------|-----------------|
| Cycle                     | Amino acid (pM) |
| 1                         | G (3.54)        |
| 2                         | G (3.15)        |
| 3                         | I (3.51)        |
| 4                         | G (2.59)        |
| 5                         | T (2.52)        |
| 6                         | T (2.32)        |
| 7                         | L (2.27)        |
| 8                         | F (1.40)        |

Table S2. ESI-FTMS fragmentation analysis of compound A1

| Monoisotopic mass |                       |                            | Daughter ion                           |                                    |            |                   |               |
|-------------------|-----------------------|----------------------------|----------------------------------------|------------------------------------|------------|-------------------|---------------|
| Calculated*       | Observed <sup>+</sup> | $\Delta_{\text{calc-obs}}$ | proposed structure                     | Name <sup>●</sup>                  | Charge (z) | Method(s)         | Parent ion(s) |
| 274.1251          | 274.1175              | 0.008                      | HH                                     | b <sub>2</sub>                     | 1          | IRMPD             | 923           |
| 291.1516          | 291.1944              | -0.04                      | HH                                     | c <sub>2</sub>                     | 1          | IRMPD             | 923           |
| 392.2496          | 393.1658              | -0.92                      | LPVT                                   | b <sub>4''</sub> -H <sub>2</sub> O | 1          | IRMPD             | 923, 1153     |
|                   | 393.1658              | -0.92                      |                                        |                                    | 1          | aiECD             | 1153          |
| 403.214           | 403.2064              | 0.008                      | QEK                                    | y <sub>3'</sub>                    | 1          | IRMPD             | 923, 1153     |
|                   |                       |                            |                                        |                                    | 1          | aiECD             | 1153          |
| 822.3607          | 822.3524              | 0.008                      | HHHHHH                                 | b <sub>6</sub>                     | 2          | IRMPD             | 923           |
| 1293.6413         | 1293.634              | 0.008                      | HHHHHHGAVLN                            | c <sub>11</sub>                    | 1          | aiECD             | 1153          |
| 1456.7046         | 1456.696              | 0.009                      | HHHHHHGAVLNY                           | c <sub>12</sub>                    | 2          | ECD               | 923           |
| 1536.6944         | 1536.689              | 0.006                      | HHHHHHGAVLNVD                          | b <sub>13</sub> -H <sub>2</sub> O  | 2          | IRMPD, aiECD      | 923           |
|                   |                       |                            |                                        |                                    | 1,2        | IRMPD, aiECD      | 1153          |
| 1554.705          | 1554.698              | 0.008                      | HHHHHHGAVLNVD                          | b <sub>13</sub>                    | 1,2        | aiECD             | 1153          |
|                   |                       |                            |                                        |                                    | 2          | CAD, IRMPD, aiECD | 923           |
|                   |                       |                            |                                        |                                    | 1          | CAD, IRMPD        | 1153          |
| 1653.7734         | 1653.765              | 0.008                      | HHHHHHGAVLNVDV                         | b <sub>14</sub>                    | 2          | CAD, IRMPD, aiECD | 1153, 923     |
| 1790.8323         | 1790.824              | 0.009                      | HHHHHHGAVLNVDVH                        | b <sub>15</sub>                    | 2          | CAD, IRMPD aiECD  | 1153          |
|                   |                       |                            |                                        |                                    | 2,3        | IRMPD             | 923           |
| 1807.8589         | 1807.849              | 0.01                       | HHHHHHGAVLNVDVH                        | c <sub>15</sub>                    | 2          | ECD               | 923           |
| 1885.9058         | 1885.902              | 0.004                      | HHHHHHGAVLNVDVHL                       | b <sub>16</sub> -H <sub>2</sub> O  | 2          | IRMPD             | 1153          |
| 1885.9494         | 1885.902              | 0.048                      | N(GTLTIHKYEQEK)EIM*                    | y <sub>4</sub> -H <sub>2</sub> O   | 2          | IRMPD             | 1153          |
| 1903.9164         | 1903.907              | 0.009                      | HHHHHHGAVLNVDVHL                       | b <sub>16</sub>                    | 2          | IRMPD             | 923           |
| 1903.96           | 1903.909              | 0.051                      | N(GTLTIHKYEQEK)EIM*                    | y <sub>4</sub>                     | 3          | IRMPD             | 923           |
|                   |                       |                            |                                        |                                    | 2          | CAD, IRMPD, aiECD | 1153          |
| 1920.9429         | 1920.932              | 0.011                      | HHHHHHGAVLNVDVHL                       | c <sub>16</sub>                    | 2          | ECD               | 923           |
| 2048.9692         | 2048.963              | 0.006                      | HHHHHHGAVLNVDVHLY                      | b <sub>17</sub> -H <sub>2</sub> O  | 2          | IRMPD             | 1153          |
| 2066.9797         | 2066.971              | 0.009                      | HHHHHHGAVLNVDVHLY                      | b <sub>17</sub>                    | 2,3        | IRMPD             | 923           |
|                   |                       |                            |                                        |                                    | 2          | CAD, IRMPD, aiECD | 1153          |
| 2119.011          | 2118.134              | 0.877                      | HHHHHHGAVLNVDVHLYP                     | a <sub>18</sub> -NH <sub>3</sub>   | 2          | IRMPD             | 923           |
| 2521.3501         | 2521.339              | 0.009                      | PK(LPVT)N(GTLTIHKYEQEK)EIM*            | y <sub>6</sub> -H <sub>2</sub> O   | 2          | CAD, IRMPD, aiECD | 1153          |
|                   |                       |                            |                                        |                                    | 2          | IRMPD             | 923           |
| 2539.3606         | 2539.353              | 0.008                      | PK(LPVT)N(GTLTIHKYEQEK)EIM*            | y <sub>6</sub>                     | 2          | CAD, IRMPD        | 923           |
|                   |                       |                            |                                        |                                    | 2          | CAD, IRMPD, aiECD | 1153          |
| 2684.3698         | 2684.4                | -0.03                      | HHHHHHGAVLNVDVHLYPK(LPVT)              | b <sub>19</sub> -H <sub>2</sub> O  | 2          | CAD               | 923           |
| 2684.4134         | 2684.404              | 0.009                      | YPK(LPVT)N(GTLTIHKYEQEK)EIM*           | y <sub>7</sub> -H <sub>2</sub> O   | 2          | CAD, IRMPD, aiECD | 1153          |
|                   |                       |                            |                                        |                                    | 2          | IRMPD             | 923           |
| 2702.3804         | 2702.413              | -0.03                      | HHHHHHGAVLNVDVHLYPK(LPVT)              | b <sub>19</sub>                    | 2          | CAD               | 923           |
| 2702.424          | 2702.415              | 0.01                       | YPK(LPVT)N(GTLTIHKYEQEK)EIM*           | y <sub>7</sub>                     | 2          | IRMPD             | 923           |
|                   |                       |                            |                                        |                                    | 2          | CAD               | 1153          |
| 2719.4069         | 2719.396              | 0.011                      | HHHHHHGAVLNVDVHLYPK(LPVT)              | c <sub>19</sub>                    | 2          | ECD               | 923           |
|                   |                       |                            |                                        |                                    | 2          | aiECD             | 1153          |
| 2797.4975         | 2797.496              | 0.002                      | LYPK(LPVT)N(GTLTIHKYEQEK)EIM*          | y <sub>8</sub> -H <sub>2</sub> O   | 2,3        | IRMPD             | 923           |
|                   |                       |                            |                                        |                                    | 2          | CAD               | 923           |
| 2815.508          | 2815.496              | 0.012                      | LYPK(LPVT)N(GTLTIHKYEQEK)EIM*          | y <sub>8</sub>                     | 2,3        | IRMPD             | 923           |
|                   |                       |                            |                                        |                                    | 2          | CAD               | 923, 1153     |
| 2934.5564         | 2934.559              | -0.003                     | HLYPK(LPVT)N(GTLTIHKYEQEK)EIM*         | y <sub>9</sub> -H <sub>2</sub> O   | 2          | CAD, IRMPD        | 1153          |
| 2952.5669         | 2952.559              | 0.008                      | HLYPK(LPVT)N(GTLTIHKYEQEK)EIM*         | y <sub>9</sub>                     | 2          | CAD               | 1153          |
|                   |                       |                            |                                        |                                    | 3          | CAD               | 923           |
| 3033.6248         | 3033.618              | 0.007                      | VHLYPK(LPVT)N(GTLTIHKYEQEK)EIM*        | y <sub>10</sub> -H <sub>2</sub> O  | 3          | CAD, IRMPD, aiECD | 923           |
|                   |                       |                            |                                        |                                    | 2,3        | CAD, IRMPD, aiECD | 1153          |
| 3051.6354         | 3051.627              | 0.009                      | VHLYPK(LPVT)N(GTLTIHKYEQEK)EIM*        | y <sub>10</sub>                    | 3          | CAD, IRMPD, aiECD | 923           |
|                   |                       |                            |                                        |                                    | 2,3        | CAD, IRMPD, aiECD | 1153          |
| 3166.6623         | 3166.664              | -0.002                     | DVHLYPK(LPVT)N(GTLTIHKYEQEK)EIM*       | y <sub>11</sub>                    | 2          | CAD               | 1153          |
| 3311.7151         | 3311.713              | 0.002                      | YDVHLYPK(LPVT)N(GTLTIHKYEQEK)EIM*      | y <sub>12</sub> -H <sub>2</sub> O  | 3          | IRMPD             | 1153          |
| 3425.758          | 3425.75               | 0.008                      | NYDVHLYPK(LPVT)N(GTLTIHKYEQEK)EIM*     | y <sub>13</sub> -H <sub>2</sub> O  | 2          | CAD               | 1153          |
| 3443.7686         | 3443.744              | 0.025                      | NYDVHLYPK(LPVT)N(GTLTIHKYEQEK)EIM*     | y <sub>13</sub>                    | 2          | CAD               | 1153          |
| 3538.8421         | 3538.842              | 0                          | LNYDVHLYPK(LPVT)N(GTLTIHKYEQEK)EIM*    | y <sub>14</sub> -H <sub>2</sub> O  | 3          | IRMPD             | 923           |
| 3556.8526         | 3556.842              | 0.011                      | LNYDVHLYPK(LPVT)N(GTLTIHKYEQEK)EIM*    | y <sub>14</sub>                    | 3          | CAD               | 923           |
|                   |                       |                            |                                        |                                    | 2          | CAD               | 1153          |
| 3655.921          | 3655.906              | 0.015                      | VLNYDVHLYPK(LPVT)N(GTLTIHKYEQEK)EIM*   | y <sub>15</sub>                    | 3          | CAD               | 923           |
| 3726.9582         | 3726.943              | 0.015                      | AVLNVDVHLYPK(LPVT)N(GTLTIHKYEQEK)EIM*  | y <sub>16</sub>                    | 3          | CAD               | 923           |
| 3765.9691         | 3765.953              | 0.016                      | GAVLNVDVHLYPK(LPVT)N(GTLTIHKYEQEK)EIM* | y <sub>17</sub> -H <sub>2</sub> O  | 3          | CAD, IRMPD        | 923           |
| 3783.9796         | 3783.972              | 0.007                      | GAVLNVDVHLYPK(LPVT)N(GTLTIHKYEQEK)EIM* | y <sub>17</sub>                    | 3          | CAD               | 923, 1153     |

| Monoisotopic mass |                       |                            | Daughter ion                               |                             |            |                   |               |
|-------------------|-----------------------|----------------------------|--------------------------------------------|-----------------------------|------------|-------------------|---------------|
| Calculated*       | Observed <sup>+</sup> | $\Delta_{\text{calc-obs}}$ | proposed structure                         | Name <sup>●</sup>           | Charge (z) | Method(s)         | Parent ion(s) |
| 3903.028          | 3903.018              | 0.01                       | HGAVLNVDVHLYPK(LPVT)N(GTLTIHKYEQEK)EIM*    | $y_{18}$ -H <sub>2</sub> O  | 3          | CAD, IRMPD        | 1153          |
|                   |                       |                            |                                            |                             | 3          | CAD               | 923           |
|                   |                       |                            |                                            |                             | 3,4        | IRMPD             | 923           |
| 3911.0205         | 3911.007              | 0.014                      | HHHHHHGAVLNVDVHLYPK(LPVT)N(GTLTIHK)        | $b_{7'}$                    | 3          | CAD               | 1153          |
| 3921.0385         | 3921.023              | 0.016                      | HGAVLNVDVHLYPK(LPVT)N(GTLTIHKYEQEK)EIM*    | $y_{18}$                    | 3          | CAD               | 1153          |
|                   |                       |                            |                                            |                             | 3,4        | CAD               | 923           |
| 3965.9787         | 3965.968              | 0.011                      | HHHHHHGAVLNVDVHLYPK(LPVT)N(KYEQEK)         | $y_{6'}$ -H <sub>2</sub> O  | 3          | CAD, IRMPD        | 1153          |
|                   |                       |                            |                                            |                             | 4          | IRMPD             | 923           |
| 3967.9705         | 3967.95               | 0.02                       | HHHHHHGAVLNVDVHLYPK(LPVT)N(KYEQEK)         | $z_{6'}$                    | 2          | ECD               | 1153          |
|                   |                       |                            |                                            |                             | 3          | ECD               | 923           |
| 3983.9892         | 3983.981              | 0.008                      | HHHHHHGAVLNVDVHLYPK(LPVT)N(KYEQEK)         | $y_{6'}$                    | 3          | CAD               | 1153          |
|                   |                       |                            |                                            |                             | 2          | ECD               | 1153          |
| 4040.0869         | 4040.076              | 0.011                      | HHGAVLNVDVHLYPK(LPVT)N(GTLTIHKYEQEK)EIM*   | $y_{19}$ -H <sub>2</sub> O  | 3          | ECD, IRMPD, aiECD | 1153          |
|                   |                       |                            |                                            |                             | 3,4        | IRMPD             | 923           |
| 4057.0572         | 4057.064              | -0.01                      | HHHHHHGAVLNVDVHLYPK(LPVT)N(GTLTIHKY)       | $b_{8'}$ -NH <sub>3</sub>   | 4          | IRMPD             | 923           |
|                   |                       |                            |                                            |                             | 3          | IRMPD             | 1153          |
| 4058.0974         | 4058.072              | 0.026                      | HHGAVLNVDVHLYPK(LPVT)N(GTLTIHKYEQEK)EIM*   | $y_{19}$                    | 3          | CAD               | 1153          |
|                   |                       |                            |                                            |                             | 4          | CAD               | 923           |
| 4074.0838         | 4074.064              | 0.02                       | HHHHHHGAVLNVDVHLYPK(LPVT)N(GTLTIHKY)       | $b_{8'}$                    | 3          | CAD               | 1153          |
| 4091.1103         | 4091.103              | 0.007                      | HHHHHHGAVLNVDVHLYPK(LPVT)N(GTLTIHKY)       | $c_{8'}$                    | 3          | ECD               | 923           |
| 4103.0376         | 4103.022              | 0.016                      | HHHHHHGAVLNVDVHLYPK(LPVT)N(HKYEQEK)        | $y_{7'}$ -H <sub>2</sub> O  | 3          | CAD               | 1153          |
|                   |                       |                            |                                            |                             | 4          | IRMPD             | 923           |
| 4121.0481         | 4121.037              | 0.011                      | HHHHHHGAVLNVDVHLYPK(LPVT)N(HKYEQEK)        | $y_{7'}$                    | 4          | CAD               | 923           |
|                   |                       |                            |                                            |                             | 3          | CAD               | 1153          |
| 4177.1458         | 4177.139              | 0.007                      | HHHGAVLNVDVHLYPK(LPVT)N(GTLTIHKYEQEK)EIM*  | $y_{20}$ -H <sub>2</sub> O  | 4          | IRMPD             | 923           |
|                   |                       |                            |                                            |                             | 3          | CAD, IRMPD, aiECD | 1153          |
| 4178.0696         | 4178.054              | 0.016                      | HHHHHHGAVLNVDVHLYPKN(GTLTIHKYEQEK)EIM*     | $y_{1''}$ -H <sub>2</sub> O | 4          | IRMPD             | 1153          |
| 4178.1298         | 4178.059              | 0.071                      | HHHGAVLNVDVHLYPK(LPVT)N(GTLTIHKYEQEK)EIM*  | $y_{20}$ -NH <sub>3</sub>   | 4          | IRMPD, aiECD      | 1153          |
| 4179.0536         | 4179.129              | -0.08                      | HHHHHHGAVLNVDVHLYPKN(GTLTIHKYEQEK)EIM*     | $y_{1''}$ -NH <sub>3</sub>  | 3          | ECD               | 923           |
| 4179.1376         | 4179.129              | 0.009                      | HHHGAVLNVDVHLYPK(LPVT)N(GTLTIHKYEQEK)EIM*  | $z_{20}$                    | 3          | ECD               | 923           |
| 4185.1158         | 4185.104              | 0.012                      | HHHHHHGAVLNVDVHLYPK(LPVT)N(GTLTIHKYE)EIM*  | $b_{9'}$ -H <sub>2</sub> O  | 3          | CAD, IRMPD, aiECD | 1153          |
|                   |                       |                            |                                            |                             | 4          | IRMPD             | 923           |
| 4195.1564         | 4195.145              | 0.011                      | HHHGAVLNVDVHLYPK(LPVT)N(GTLTIHKYEQEK)EIM*  | $y_{20}$                    | 3,4        | CAD, IRMPD        | 1153          |
| 4203.1264         | 4203.113              | 0.013                      | HHHHHHGAVLNVDVHLYPK(LPVT)N(GTLTIHKYE)EIM*  | $b_{9'}$                    | 3          | CAD, IRMPD, aiECD | 1153          |
|                   |                       |                            |                                            |                             | 4          | CAD, IRMPD        | 923           |
| 4220.1529         | 4220.148              | 0.005                      | HHHHHHGAVLNVDVHLYPK(LPVT)N(GTLTIHKYE)EIM*  | $c_{9'}$                    | 3          | ECD               | 923           |
| 4244.1642         | 4244.069              | 0.095                      | HHHHHHGAVLNVDVHLYPK(LPVT)N(GTLTIHKYEQEK)   | $c_{20}$                    | 4          | IRMPD, aiECD      | 1153          |
| 4279.1173         | 4279.103              | 0.015                      | HHHHHHGAVLNVDVHLYPK(T)N(GTLTIHKYEQEK)EIM*  | $y_{2''}$ -H <sub>2</sub> O | 3,4        | CAD, IRMPD, aiECD | 1153          |
|                   |                       |                            |                                            |                             | 4,5        | IRMPD             | 923           |
| 4281.1091         | 4281.104              | 0.005                      | HHHHHHGAVLNVDVHLYPK(T)N(GTLTIHKYEQEK)EIM*  | $z_{2''}$                   | 3          | ECD               | 1153, 923     |
| 4297.1278         | 4297.11               | 0.018                      | HHHHHHGAVLNVDVHLYPK(T)N(GTLTIHKYEQEK)EIM*  | $y_{2''}$                   | 3,4        | CAD               | 1153          |
|                   |                       |                            |                                            |                             | 4          | CAD               | 923           |
|                   |                       |                            |                                            |                             | 4,5        | IRMPD             | 923           |
|                   |                       |                            |                                            |                             | 4          | IRMPD, aiECD      | 1153          |
| 4314.1584         | 4314.188              | -0.03                      | HHHHHHGAVLNVDVHLYPK(LPVT)N(GTLTIHKYE)EIM*  | $b_{10'}$ -NH <sub>3</sub>  | 4          | CAD               | 923           |
| 4314.2047         | 4314.194              | 0.011                      | HHHHGAVLNVDVHLYPK(LPVT)N(GTLTIHKYEQEK)EIM* | $y_{21}$ -H <sub>2</sub> O  | 4          | IRMPD             | 923           |
|                   |                       |                            |                                            |                             | 3          | CAD, IRMPD, aiECD | 1153          |
| 4319.1612         | 4319.151              | 0.01                       | HHHHHHGAVLNVDVHLYPK(LPVT)N(TIHKYEQEK)EIM*  | $z_{9'}$                    | 3          | ECD               | 1153          |
| 4332.2153         | 4332.203              | 0.012                      | HHHHGAVLNVDVHLYPK(LPVT)N(GTLTIHKYEQEK)EIM* | $y_{21}$                    | 4          | CAD, IRMPD        | 923           |
|                   |                       |                            |                                            |                             | 3          | CAD, IRMPD, aiECD | 1153          |
|                   |                       |                            |                                            |                             | 4          | CAD               | 1153          |
| 4335.1799         | 4335.169              | 0.011                      | HHHHHHGAVLNVDVHLYPK(LPVT)N(TIHKYEQEK)EIM*  | $y_{9'}$                    | 3          | ECD               | 1153          |
| 4348.2115         | 4347.188              | 1.024                      | HHHHHHGAVLNVDVHLYPK(LPVT)N(GTLTIHKYE)EIM*  | $c_{10'}$                   | 3          | ECD               | 1153          |
| 4356.1802         | 4356.169              | 0.011                      | HHHHHHGAVLNVDVHLYPK(LPVT)N(GTLTIHKYEQEK)E  | $b_{21}$                    | 5          | IRMPD             | 923           |
| 4374.1908         | 4374.179              | 0.012                      | HHHHHHGAVLNVDVHLYPK(LPVT)N(GTLTIHKYEQEK)E  | $b_{21}$                    | 4          | IRMPD             | 1153          |
|                   |                       |                            |                                            | +H <sub>2</sub> O           |            |                   |               |
| 4378.1857         | 4378.18               | 0.005                      | HHHHHHGAVLNVDVHLYPK(VT)N(GTLTIHKYEQEK)EIM* | $y_{3''}$ -H <sub>2</sub> O | 3          | CAD               | 1153          |
|                   |                       |                            |                                            |                             | 4          | IRMPD, aiECD      | 1153          |
|                   |                       |                            |                                            |                             | 5          | IRMPD             | 923           |
| 4380.1775         | 4380.17               | 0.007                      | HHHHHHGAVLNVDVHLYPK(VT)N(GTLTIHKYEQEK)EIM* | $z_{3''}$                   | 3          | ECD               | 1153          |
| 4396.1963         | 4396.188              | 0.008                      | HHHHHHGAVLNVDVHLYPK(VT)N(GTLTIHKYEQEK)EIM* | $y_{3''}$                   | 5          | IRMPD, aiECD      | 923           |
|                   |                       |                            |                                            |                             | 4          | CAD, IRMPD, aiECD | 1153          |
|                   |                       |                            |                                            |                             | 3          | CAD               | 1153          |

| Monoisotopic mass |                       |                            | Daughter ion                                 |                                    |            |                   |      | Parent ion(s) |
|-------------------|-----------------------|----------------------------|----------------------------------------------|------------------------------------|------------|-------------------|------|---------------|
| Calculated*       | Observed <sup>+</sup> | $\Delta_{\text{calc-obs}}$ | proposed structure                           | Name <sup>●</sup>                  | Charge (z) | Method(s)         |      |               |
| 4424.2428         | 4424.193              | 0.05                       | HHHHHHGAVLNVDVHLYPK(LPVT)N(GTLTIHKYEQEK)EI   | a <sub>22</sub> -NH <sub>3</sub>   | 4          | IRMPD, aiECD      | 1153 |               |
| 4432.2326         | 4432.227              | 0.005                      | HHHHHHGAVLNVDVHLYPK(LPVT)N(GTLTIHKYEQEK)EIM* | a <sub>11'</sub>                   | 4          | ECD               | 923  |               |
|                   |                       |                            |                                              |                                    | 3          | ECD               | 1153 |               |
| 4432.2452         | 4432.241              | 0.004                      | HHHHHHGAVLNVDVHLYPK(LPVT)N(LTIHKYEQEK)EIM*   | z <sub>10'</sub>                   | 5          | IRMPD             | 923  |               |
|                   |                       |                            |                                              |                                    | 3          | ECD               | 1153 |               |
| 4442.217          | 4442.206              | 0.011                      | HHHHHHGAVLNVDVHLYPK(LPVT)N(GTLTIHKYEQEK)EIM* | b <sub>11'</sub> -H <sub>2</sub> O | 4,5        | IRMPD             | 923  |               |
|                   |                       |                            |                                              |                                    | 4          | CAD               | 1153 |               |
|                   |                       |                            |                                              |                                    | 3,4        | IRMPD, aiECD      | 1153 |               |
| 4451.2537         | 4451.251              | 0.003                      | HHHHHHGAVLNVDVHLYPK(LPVT)N(GTLTIHKYEQEK)EI   | b <sub>22</sub> -H <sub>2</sub> O  | 4          | aiECD             | 1153 |               |
| 4451.2636         | 4451.256              | 0.008                      | HHHHHHGAVLNVDVHLYPK(LPVT)N(GTLTIHKYEQEK)EIM* | y <sub>22</sub> -H <sub>2</sub> O  | 4          | CAD, IRMPD        | 1153 |               |
|                   |                       |                            |                                              |                                    | 5          | IRMPD             | 923  |               |
| 4453.2555         | 4453.249              | 0.006                      | HHHHHHGAVLNVDVHLYPK(LPVT)N(GTLTIHKYEQEK)EIM* | z <sub>22</sub>                    | 3          | ECD               | 1153 |               |
| 4460.2276         | 4460.223              | 0.004                      | HHHHHHGAVLNVDVHLYPK(LPVT)N(GTLTIHKYEQEK)EIM* | b <sub>11'</sub>                   | 3,4        | CAD               | 1153 |               |
|                   |                       |                            |                                              |                                    | 4          | IRMPD, aiECD      | 1153 |               |
|                   |                       |                            |                                              |                                    | 4          | CAD               | 923  |               |
|                   |                       |                            |                                              |                                    | 4,5        | IRMPD             | 923  |               |
| 4469.2643         | 4469.256              | 0.008                      | HHHHHHGAVLNVDVHLYPK(LPVT)N(GTLTIHKYEQEK)EI   | b <sub>22</sub> or                 | 5          | IRMPD             | 923  |               |
| 4469.2742         | 4469.256              | 0.018                      | HHHHHHGAVLNVDVHLYPK(LPVT)N(GTLTIHKYEQEK)EIM* | y <sub>22</sub>                    | 4          | CAD, IRMPD, aiECD | 1153 |               |
|                   |                       |                            |                                              |                                    | 4,5        | CAD               | 923  |               |
| 4477.2541         | 4477.242              | 0.012                      | HHHHHHGAVLNVDVHLYPK(LPVT)N(GTLTIHKYEQEK)EIM* | c <sub>11'</sub>                   | 4          | aiECD             | 1153 |               |
|                   |                       |                            |                                              |                                    | 4          | ECD               | 923  |               |
| 4478.2381         | 4478.229              | 0.01                       | HHHHHHGAVLNVDVHLYPK(LPVT)N(GTLTIHKYEQEK)EIM* | b <sub>11'</sub>                   | 3          | ECD               | 1153 |               |
|                   |                       |                            |                                              | +H <sub>2</sub> O                  | 5          | IRMPD             | 923  |               |
|                   |                       |                            |                                              |                                    | 4          | CAD, IRMPD        | 1153 |               |
| 4487.2748         | 4487.266              | 0.009                      | HHHHHHGAVLNVDVHLYPK(LPVT)N(GTLTIHKYEQEK)EI   | b <sub>22</sub>                    | 5          | CAD, IRMPD, aiECD | 923  |               |
|                   |                       |                            |                                              | +H <sub>2</sub> O                  |            |                   |      |               |
|                   |                       |                            |                                              |                                    | 4          | CAD, IRMPD, aiECD | 1153 |               |
| 4493.249          | 4492.274              | 0.975                      | HHHHHHGAVLNVDVHLYPK(PVT)N(GTLTIHKYEQEK)EIM*  | y <sub>4''</sub>                   | 4          | CAD               | 1153 |               |
| 4531.3011         | 4531.275              | 0.026                      | HHHHHHGAVLNVDVHLYPK(LPVT)N(TLTIHKYEQEK)EIM*  | y <sub>11'</sub> -H <sub>2</sub> O | 5          | IRMPD, aiECD      | 923  |               |
| 4533.2929         | 4533.289              | 0.004                      | HHHHHHGAVLNVDVHLYPK(LPVT)N(TLTIHKYEQEK)EIM*  | z <sub>11'</sub>                   | 3          | ECD               | 1153 |               |
| 4549.3116         | 4549.271              | 0.041                      | HHHHHHGAVLNVDVHLYPK(LPVT)N(TLTIHKYEQEK)EIM*  | y <sub>11'</sub>                   | 5          | IRMPD             | 923  |               |

\*Internal ions are not included in this table.

+Observed mass values from each fragmentation method were averaged.

● "Daughter ions that arose from the LPVT branch." denoted daughter ions that arose from the GTLTIHKYEQEK branch. Other ions denote daughter ions that arose from the HHHHHHGAVLNVDVHLYPKNEIM\* branch. M\* denotes a homoserine residue.

**Table S3. ESI-FTMS of BcpA<sub>His6</sub> and its variants**

| Plasmid | Allele       | Average molecular weight |             | $\Delta_{\text{calc-obs}}$ | Isopeptide bonds |
|---------|--------------|--------------------------|-------------|----------------------------|------------------|
|         |              | Calculated               | Observed    |                            |                  |
| pJB7    | wt           | 56697.27                 | 56648.60417 | 48.66583                   | 3                |
| pJB97   | E472A        | 56639.24                 | 56603.81769 | 35.42231                   | 2                |
| pJB98   | E223A        | 56639.24                 | 56603.83043 | 35.40957                   | 2                |
| pJB105  | E472A, E223A | 56581.2                  | 56564.34909 | 16.85091                   | 1                |



Table S4. MALDI-MS/MS CAD fragmentation analysis of compound A

| <i>m/z</i> |           |                            |                            |  |                                  |
|------------|-----------|----------------------------|----------------------------|--|----------------------------------|
| Calculated | Observed  | $\Delta_{\text{calc-obs}}$ | Proposed structure         |  | Ion type*                        |
| 86.0964    | 86.1496   | -0.0532                    | L                          |  | Immonium                         |
| 110.0713   | 110.1216  | -0.0503                    | H                          |  | Immonium                         |
| 247.1302   | 247.1691  | -0.0389                    | HH                         |  | a <sub>2</sub>                   |
| 275.1251   | 275.174   | -0.0489                    | HH                         |  | b <sub>2</sub>                   |
| 365.1932   | 365.2299  | -0.0367                    | HGAV                       |  | i                                |
| 384.1891   | 384.2241  | -0.035                     | HHH                        |  | a <sub>3</sub>                   |
| 393.2496   | 394.1976  | -0.948                     | LPVT                       |  | b <sub>4</sub> -H <sub>2</sub> O |
| 412.184    | 412.2247  | -0.0407                    | HHH                        |  | b <sub>3</sub>                   |
| 502.2521   | 502.2945  | -0.0424                    | HHGAV                      |  | i                                |
| 502.3024   | 502.2945  | 0.0079                     | LYPK                       |  | i                                |
| 521.248    | 521.265   | -0.017                     | HHHH                       |  | a <sub>4</sub>                   |
| 549.2429   | 549.226   | 0.0169                     | HHHH                       |  | b <sub>4</sub>                   |
| 577.298    | 577.2341  | 0.0639                     | VLNYD                      |  | i-28                             |
|            |           |                            | LNVDV                      |  | i-28                             |
| 639.311    | 639.3176  | -0.0066                    | HHHGAV                     |  | i                                |
| 639.3613   | 639.3176  | 0.0437                     | HLYPK                      |  | i                                |
| 658.3069   | 658.2913  | 0.0156                     | HHHHH                      |  | a <sub>5</sub>                   |
| 686.3018   | 686.2844  | 0.0174                     | HHHHH                      |  | b <sub>5</sub>                   |
| 729.3791   | 729.3043  | 0.0748                     | HHGAVLN                    |  | i                                |
| 714.357    | 714.3141  | 0.0429                     | LNVDVH                     |  | i-28                             |
|            |           |                            | NYDVHL                     |  | i-28                             |
| 742.3519   | 742.3034  | 0.0485                     | LNVDVH                     |  | i                                |
|            |           |                            | NYDVHL                     |  | i                                |
| 795.3658   | 795.3447  | 0.0211                     | HHHHHH                     |  | a <sub>6</sub>                   |
| 823.3607   | 823.3509  | 0.0098                     | HHHHHH                     |  | b <sub>6</sub>                   |
| 866.438    | 866.3511  | 0.0869                     | HHHGAVLN                   |  | i                                |
| 870.4104   | 870.3921  | 0.0183                     | HGAVLNVD                   |  | i                                |
| 880.3822   | 880.3527  | 0.0295                     | HHHHHHG                    |  | b <sub>7</sub>                   |
| 923.4244   | 923.3816  | 0.0428                     | HHHHHHGA                   |  | a <sub>8</sub>                   |
| 951.4193   | 951.3538  | 0.0655                     | HHHHHHGA                   |  | b <sub>8</sub>                   |
| 969.4789   | 969.4863  | -0.0074                    | GAVLNVDVH                  |  | i                                |
| 969.4789   | 969.4863  | -0.0074                    | HGAVLNVDV                  |  | i                                |
| 1007.4694  | 1007.4189 | 0.0505                     | HHGAVLNVD                  |  | i                                |
| 1022.4928  | 1022.4398 | 0.053                      | HHHHHHGAV                  |  | a <sub>9</sub>                   |
| 1050.4877  | 1050.5219 | -0.0342                    | HHHHHHGAV                  |  | b <sub>9</sub>                   |
| 1106.5378  | 1106.5409 | -0.0031                    | HHGAVLNVDV                 |  | i                                |
| 1144.5283  | 1144.5115 | 0.0168                     | HHHGAVLNVD                 |  | i                                |
| 1163.5718  | 1163.533  | 0.0388                     | HHHHHHGAVL                 |  | b <sub>10</sub>                  |
| 1202.5953  | 1202.4943 | 0.101                      | HGAVLNVDVHL                |  | i-NH <sub>3</sub>                |
| 1245.6262  | 1245.6366 | -0.0104                    | GAVLNVDVHLY                |  | i                                |
| 1277.6147  | 1277.5817 | 0.033                      | HHHHHHGAVLN                |  | b <sub>11</sub>                  |
| 1356.6376  | 1356.6807 | -0.0431                    | HHGAVLNVDVHL               |  | i                                |
| 1440.6781  | 1440.6433 | 0.0348                     | HHHHHHGAVLN                |  | b <sub>12</sub>                  |
| 1493.7397  | 1493.7289 | 0.0108                     | HHHGAVLNVDVHL              |  | i                                |
| 1555.705   | 1555.696  | 0.009                      | HHHHHHGAVLNVDV             |  | b <sub>14</sub>                  |
| 1791.8323  | 1791.8667 | -0.0344                    | HHHHHHGAVLNVDVH            |  | b <sub>15</sub>                  |
| 1797.9183  | 1797.666  | 0.2523                     | HHGAVLNVDVHLYPKA           |  | i-H <sub>2</sub> O               |
| 1904.9164  | 1904.9685 | -0.0521                    | HHHHHHGAVLNVDVHL           |  | b <sub>16</sub>                  |
| 2039.9848  | 2040.0516 | -0.0668                    | HHHHHHGAVLNVDVHLY          |  | a <sub>17</sub>                  |
| 2068.1114  | 2068.0454 | 0.066                      | NYDVHLYPK(-LPVT)AEIM*      |  | y <sub>14</sub>                  |
| 2295.2383  | 2295.312  | -0.0737                    | AVLNVDVHLYPK(-LPVT)AEIM*   |  | y <sub>17</sub>                  |
| 2314.1628  | 2314.2729 | -0.1101                    | HHHHGAVLNVDVHLYPKAEI       |  | i-H <sub>2</sub> O               |
| 2432.2973  | 2432.3677 | -0.0704                    | GAVLNVDVHLYPK(-LPVT)AEIM*  |  | y <sub>18</sub>                  |
| 2569.3562  | 2569.4868 | -0.1306                    | HGAVLNVDVHLYPK(-LPVT)AEIM* |  | y <sub>19</sub>                  |
| 2707.3389  | 2707.4758 | -0.1369                    | HHHHHHGAVLNVDVHLYPKAEIM*   |  | y <sub>1'</sub>                  |
| 2843.474   | 2843.4099 | 0.0641                     | HHHGAVLNVDVHLYPK(-LPVT)A   |  | y <sub>21</sub>                  |

\*\*

Daughter ions that arose from the LPVT branch. No mark denotes daughter ions that arose from the HHHHHHGAVLNVDVHLYPKAEIM\* branch. M\* denotes a homoserine lactone residue. i denotes internal ions.
